# Supplementary material for: Promising practices for the collaborative planning of integrated health campaigns from a synthesis of case studies
Source: HighWire-hosted journal article supplement (doi:10.1136/bmjgh-2022-010321), 2022-12-01
Supplement: bmjgh-2022-010321supp001_data_supplement.pdf [file bmjgh-2022-010321supp001_data_supplement.pdf]

**Supplemental Table 1. Barriers and Mitigation Related to Integrated Health Campaign Planning in Projects Supported by the Health Campaign Effectiveness Coalition**

| Project                                              | Challenges/Barriers Faced                                                                                                                                                                                                                                                                                                                                                                                                                                                                                                                             | Mitigation                                                                                                                                                                                                                                                                                                                                                                                                                                                                                                                                       |
|------------------------------------------------------|-------------------------------------------------------------------------------------------------------------------------------------------------------------------------------------------------------------------------------------------------------------------------------------------------------------------------------------------------------------------------------------------------------------------------------------------------------------------------------------------------------------------------------------------------------|--------------------------------------------------------------------------------------------------------------------------------------------------------------------------------------------------------------------------------------------------------------------------------------------------------------------------------------------------------------------------------------------------------------------------------------------------------------------------------------------------------------------------------------------------|
| Colombia/<br>Universidad<br>de los Andes<br>[21]     | <ul style="list-style-type: none"> <li>Socio-cultural beliefs about infectious diseases and treatment</li> <li>Language barriers (indigenous languages)</li> <li>Remote locations/travel cost (many hours via boat)</li> <li>Demand for services in non-study communities</li> <li>COVID-19: delays for travel &amp; administration</li> </ul>                                                                                                                                                                                                        | <ul style="list-style-type: none"> <li>Hired local indigenous health promoter</li> <li>Using microplanning for engaging with the community (knowledge; implementation)</li> <li>Involving local stakeholders (communication)</li> <li>Involve non-study communities from early planning phase</li> </ul>                                                                                                                                                                                                                                         |
| Ghana/<br>UNICEF/<br>Ghana<br>Health<br>Service [22] | <ul style="list-style-type: none"> <li>Late-stage decision to integrate campaigns (there was pre-campaign messaging for only 1 intervention)</li> <li>Refusal in community since some people thought COVID vaccine was included</li> <li>Sporadic shortages of vitamin A, supplies</li> <li>Heavy rainfall disrupted the campaign</li> <li>Security issues (escorts, additional team)</li> <li>Delay in disbursement of funds</li> <li>Low coverage of vitamin A (age confirmation)</li> <li>Children missed (absent/refused/ not visited)</li> </ul> | <ul style="list-style-type: none"> <li>Intensified social mobilization and communication with key community leaders to address fears that the integrated campaign included COVID-19 vaccine</li> <li>Daily data monitoring via the Emergency Operations Center which enabled real-time identification and timely solutions</li> <li>A regional team provided security escort and an additional regional team</li> <li>Supervisors redistributed vitamin A and supplies, as needed</li> </ul>                                                     |
| Guinea/<br>FOSAD-<br>CEFORPAG)<br>[23]               | <ul style="list-style-type: none"> <li>Missed chances to integrate other campaigns</li> <li>Delays from funding, administrative procedures from new Ministry of Health Program</li> <li>Vaccinators dissatisfied (workload, poor motivation, administrative procedures)</li> <li>Community concerns (on vaccine safety, side effects)</li> </ul>                                                                                                                                                                                                      | <ul style="list-style-type: none"> <li>Prioritize integrated campaigns in most affected areas during other outbreak</li> <li>Decentralization of decision-making</li> <li>Opportunities to express concerns/ideas during pre-planning (vaccinators, communities)</li> <li>Timely remuneration, sufficient training, and manageable workloads of vaccinators</li> <li>Community sensitization to mitigate fears or adverse events.</li> </ul>                                                                                                     |
| India/<br>IIHMR) [24]                                | <ul style="list-style-type: none"> <li>COVID-19 &amp; natural disasters caused delays</li> <li>Different understanding of integration</li> <li>Dependence on overburdened community-level cadre called ASHAs for service delivery (concern about decreased/delayed incentives)</li> <li>Inadequate training for ASHAs</li> <li>Sporadic community resistance to campaign components (antifilarials).</li> </ul>                                                                                                                                       | <ul style="list-style-type: none"> <li>Campaigns tailored to local needs, resources</li> <li>Integration process was allowed to vary across campaigns and districts</li> <li>Capacity building of the districts for needs assessment, campaign implementation</li> <li>Earlier planning of campaign + pilot campaign</li> <li>Systematic training of ASHAs; single training manual in local language</li> <li>ASHA: technical support, real time supervision, security, incentives.</li> <li>Campaign monitoring, delivery evaluation</li> </ul> |

|                                   |                                                                                                                                                                                                                                                                                                                                                                                                                                                                                                                                                       |                                                                                                                                                                                                                                                                                                                                                                                                                                                                                            |
|-----------------------------------|-------------------------------------------------------------------------------------------------------------------------------------------------------------------------------------------------------------------------------------------------------------------------------------------------------------------------------------------------------------------------------------------------------------------------------------------------------------------------------------------------------------------------------------------------------|--------------------------------------------------------------------------------------------------------------------------------------------------------------------------------------------------------------------------------------------------------------------------------------------------------------------------------------------------------------------------------------------------------------------------------------------------------------------------------------------|
| India/<br>PATH [25]               | COVID-19 pandemic made face-to-face interviews difficult.<br>Long approval processes.<br>Diverse ideas of the concept of integration.<br>Competing priorities (COVID vaccine)                                                                                                                                                                                                                                                                                                                                                                         | Most interviews were virtual.<br>Face-to-face interviews with safety precautions<br>Sensitized participants on integration, prepared uniform definition through interview.<br>Regular communication/coordination with participants.                                                                                                                                                                                                                                                        |
| Nepal/<br>HEAL [26]               | Competing priorities (COVID-19)<br>Officials' schedules make it difficult for planning meetings<br>Lack of policy, guidelines for integration<br>Difficulties managing integrated logistics<br>No budget for awareness-raising activities<br>Confusion among community volunteers called FHCVs in sharing information (differences in the ages for the two interventions (vitamin A and lymphatic filariasis medication, different reporting structures)<br>Drug hesitancy in the community<br>Difficulty swallowing pills (among children, disabled) | Focus on integrated project plan development<br>Collaborative planning to identify solutions<br>Continued communication with officials<br>Rescheduled LF campaign enabled use of 'complementary monitoring and supervision' approach<br>Developed and distributed local, culturally-sensitive information and education materials<br>Tablet swallowing per WHO recommendations                                                                                                             |
| Nigeria/<br>CHAI [27]             | Incomplete identification and involvement of stakeholders in planning of an integrated immunization campaign<br>Poor management of conflicting priorities<br>Delayed funding (mobilization, logistics), microplanning (population targeting, resources)<br>COVID-19 impacted planning, implementation                                                                                                                                                                                                                                                 | Regular coordination platform/forum (clear terms, aims, responsibilities)<br>Targeted social mobilization, timely advocacy (integrated decision-making)<br>Clear processes, procedures, communication (national, state, delivery-level)<br>Pre-planning for: security, transportation, infection prevention and control<br>Use virtual tools for planning meetings                                                                                                                         |
| Nigeria/<br>Ibilda<br>Health [28] | Confusion over the concept of integration<br>Inadequate federal, state and local government area funding, over-dependence of donors<br>Concurrent health interventions used same pool of personnel<br>Insecurity, communal clashes across regions<br>Uncertainty of shipping and quality assurance and duration for insecticide treated nets<br>Drug administration schedule lacked flexibility for net distribution (inability to delay one intervention for another)<br>Different target age groups for interventions (more time, remuneration)     | Sensitizing all players on benefits of integration<br>Advocacy to political leaders (at all levels), existence of a government counterpart fund and fund releases<br>Early planning, approval of campaign at all levels<br>Notifying relevant security agents on campaign<br>Alignment of personnel remuneration and campaign days<br>Development of integrated national campaign guideline<br>Ownership of the integration process by the State<br>Primary Health Care Development Agency |
